# Supplementary material for: Synthesis, Crystal Structure, Hirshfeld Surface Analysis and Docking Studies of a Novel Flavone–Chalcone Hybrid Compound Demonstrating Anticancer Effects by Generating ROS through Glutathione Depletion
Source: MDPI journal article supplement (doi:10.3390/cryst12010108), 2022-01-14
Supplement: s1 [file s1]

## Supplementary Materials

**Figure S1.**  $^1\text{H}$ -NMR spectrum of compound **3**.

**Figure S2.**  $^{13}\text{C}$ -NMR spectrum of compound **3**.

**Figure S3.** Mass spectrum of compound **3**.

**Figure S4.** All possible intermolecular interactions and their contribution to the overall molecular packing interactions.

**Figure S5.** Hirshfeld surfaces mapped with  $d_{\text{norm}}$ , shape index and curvedness (A). Hirshfeld surface mapped over  $d_{\text{norm}}$  highlighting the area of intermolecular  $\text{C-H}\cdots\text{O}$  contacts, where two molecules formed inversion dimer linkage through dark red spots on the  $d_{\text{norm}}$  Hirshfeld surface (B).

**Figure S6.** 3D image obtained from nine iterated docking results between compound **3** and glutathione S-transferase containing glutathione (red color) generated by PyMol.

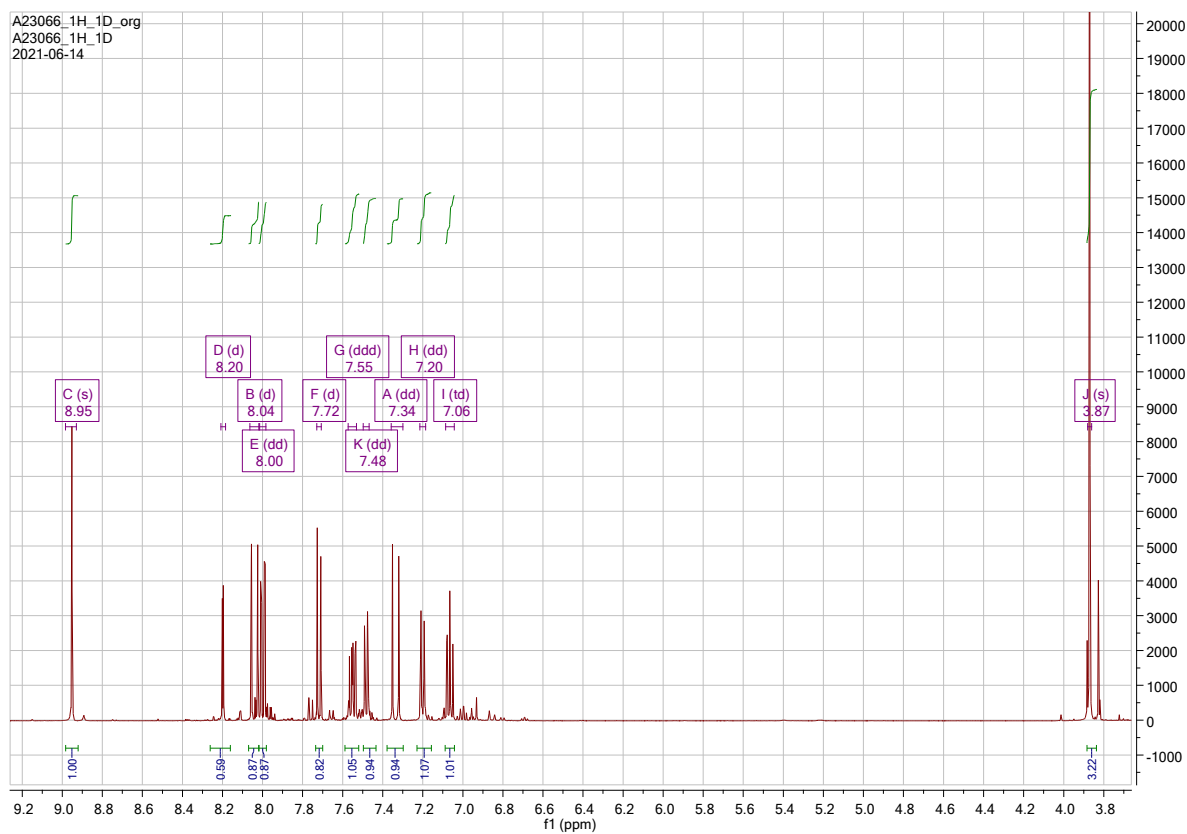

**Figure S1.**  $^1\text{H}$ -NMR spectrum of compound **3**.

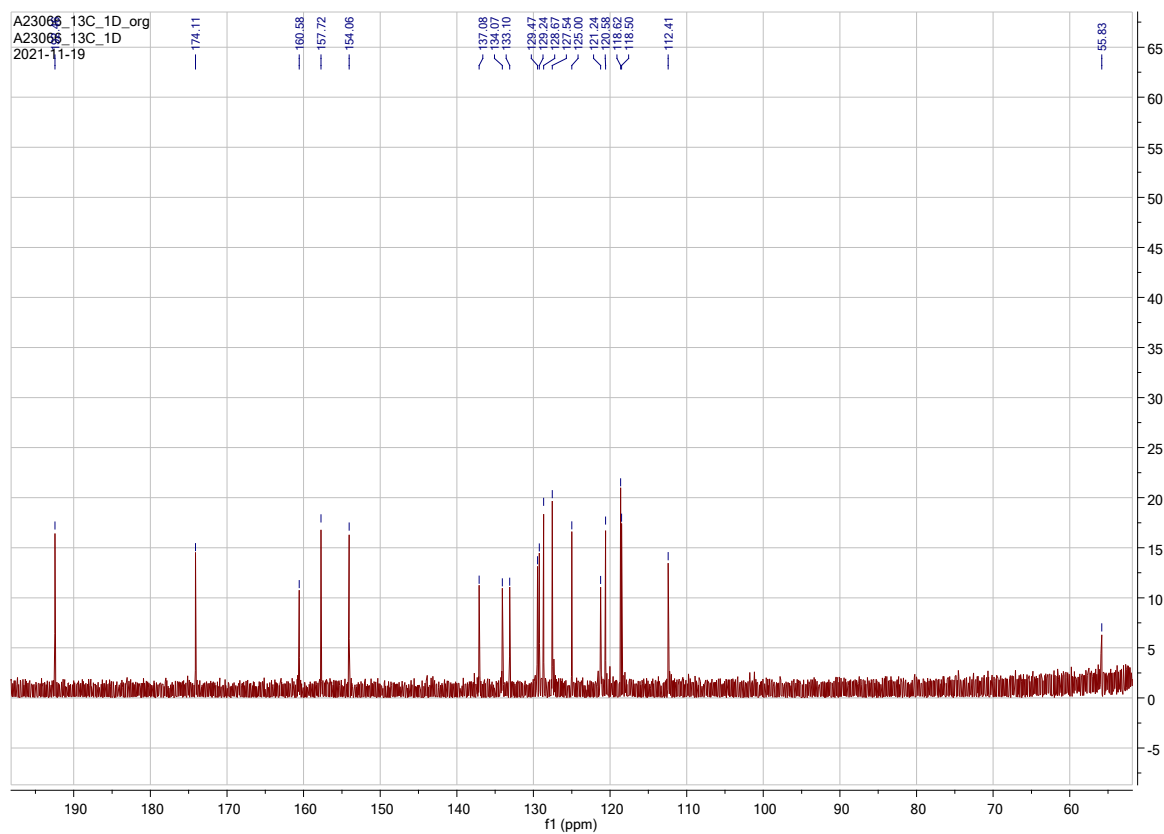

**Figure S2.**  $^{13}\text{C}$ -NMR spectrum of compound **3**.

|                        |                   |               |                        |
|------------------------|-------------------|---------------|------------------------|
| Data Filename          | 03-A23066-p.d     | Sample Name   | 03-A23066-p            |
| Sample Type            | Sample            | Position      | P1-D1                  |
| Instrument Name        | Instrument 1      | User Name     |                        |
| Acq Method             | DirectMS-2min-p.m | Acquired Time | 11/23/2021 11:02:24 AM |
| IRM Calibration Status | Success           | DA Method     | Default.m              |
| Comment                |                   |               |                        |

|              |      |                |                                     |
|--------------|------|----------------|-------------------------------------|
| Sample Group |      | Info.          |                                     |
| Stream Name  | LC 1 | Acquisition SW | 6200 series TOF/6500                |
|              |      | Version        | series Q-TOF B.06.01<br>(B6172 SP1) |

|                        |                   |               |                        |
|------------------------|-------------------|---------------|------------------------|
| Data Filename          | 13-A23066-n.d     | Sample Name   | 13-A23066-n            |
| Sample Type            | Sample            | Position      | P1-D1                  |
| Instrument Name        | Instrument 1      | User Name     |                        |
| Acq Method             | DirectMS-2min-n.m | Acquired Time | 11/23/2021 11:32:19 AM |
| IRM Calibration Status | Success           | DA Method     | Default.m              |
| Comment                |                   |               |                        |

|              |      |                |                                     |
|--------------|------|----------------|-------------------------------------|
| Sample Group |      | Info.          |                                     |
| Stream Name  | LC 1 | Acquisition SW | 6200 series TOF/6500                |
|              |      | Version        | series Q-TOF B.06.01<br>(B6172 SP1) |

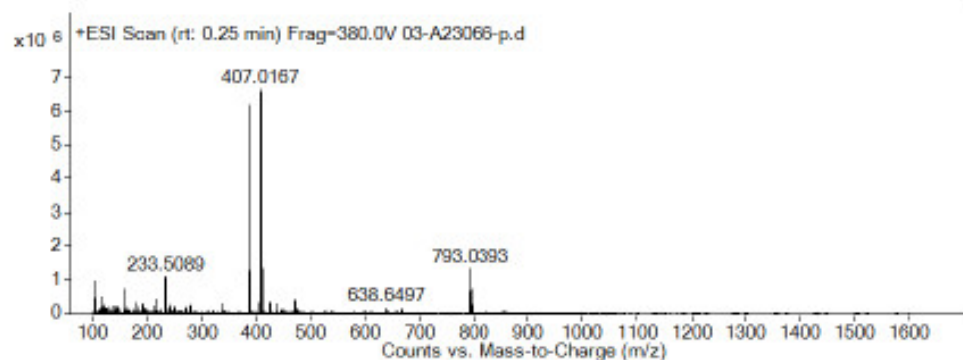

| m/z      | z | Abund      |
|----------|---|------------|
| 233.5089 | 2 | 1076724.25 |
| 385.0332 | 1 | 6192467    |
| 386.0358 | 1 | 1191099.25 |
| 387.0315 | 1 | 6104703.5  |
| 388.0341 | 1 | 1240823.63 |
| 407.0167 | 1 | 6650736    |
| 408.0191 | 1 | 1358013.13 |
| 409.015  | 1 | 6568515.5  |
| 410.0175 | 1 | 1316316.88 |
| 793.0393 | 1 | 1318459.63 |

Figure S3. Mass spectrum of compound 3.

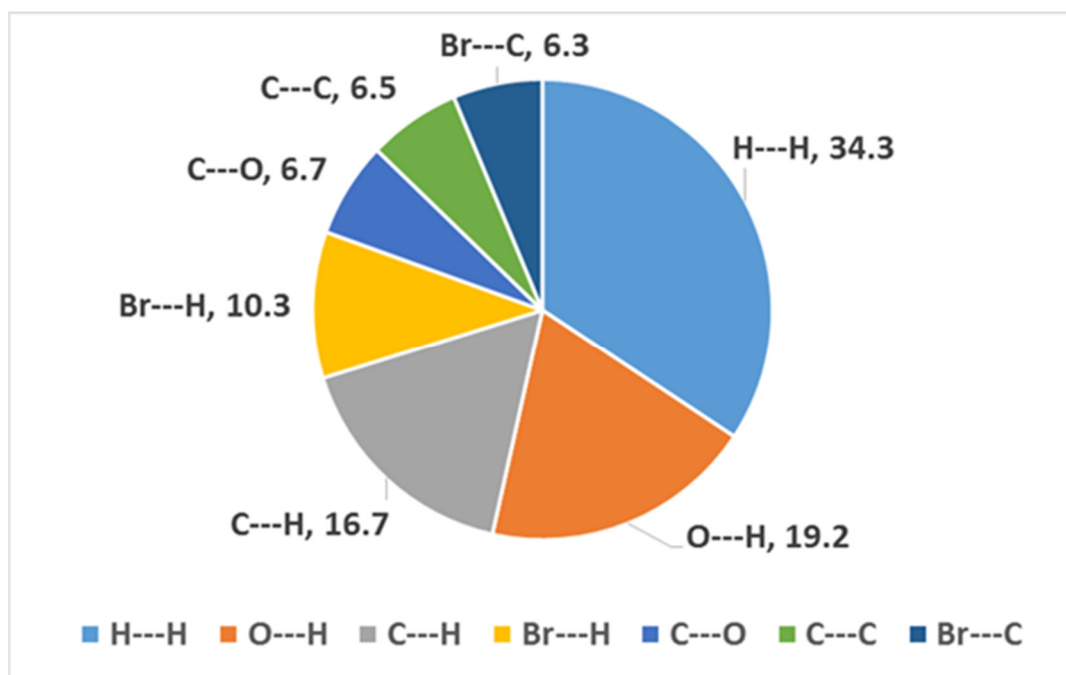

**Figure S4.** All possible intermolecular interactions and their contribution to the overall molecular packing interactions.

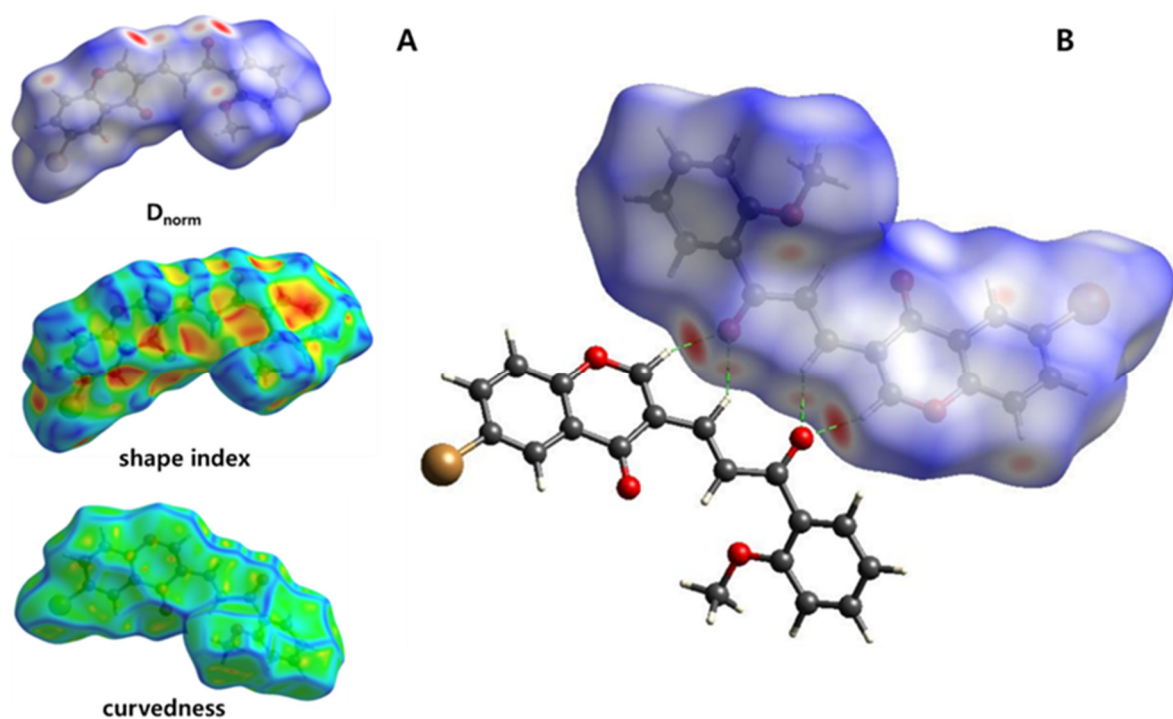

**Figure S5.** Hirshfeld surfaces mapped with  $d_{\text{norm}}$ , shape index and curvedness (A). Hirshfeld surface mapped over  $d_{\text{norm}}$  highlighting the area of intermolecular  $\text{C-H}\cdots\text{O}$  contacts, where two molecules formed inversion dimer linkage through dark red spots on the  $d_{\text{norm}}$  Hirshfeld surface (B).

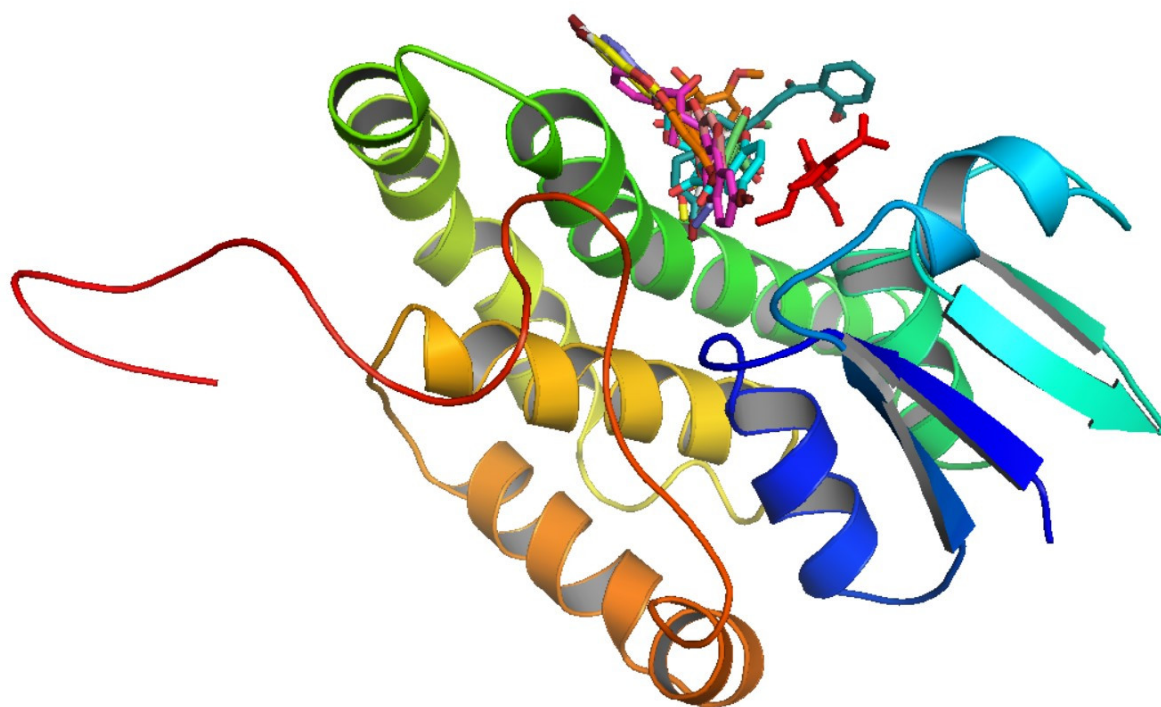

**Figure S6.** 3D image obtained from nine iterated docking results between compound 3 and glutathione S-transferase containing glutathione (red color) generated by PyMol.
